# Supplementary material for: Comparing mortality between positive and negative blood culture results: an inverse probability of treatment weighting analysis of a multicenter cohort
Source: Springer Nature journal article supplement (doi:10.1186/s12879-021-05862-w), 2021-02-17

**Supplementary Table 1.** Subgroup analysis for risk of early or late mortality between patients with culture positive and blood culture negative sepsis.

|                                    | Early mortality |         | Late mortality    |         |
|------------------------------------|-----------------|---------|-------------------|---------|
|                                    | OR(95% CI)      | P value | OR(95% CI)        | P value |
| <b>Gender</b>                      |                 |         |                   |         |
| Male                               | 0.6(0.29,1.24)  | 0.167   | 2.02(1.09,3.72)   | 0.025*  |
| <b>Age group</b>                   |                 |         |                   |         |
| Elderly (>=65 year old)            | 0.85(0.44,1.63) | 0.622   | 1.98(1.08,3.65)   | 0.028*  |
| Adult (>=18 year old)              | 0.84(0.49,1.42) | 0.507   | 2.1(1.27,3.49)    | 0.004** |
| <b>Source of infection</b>         |                 |         |                   |         |
| Lower respiratory tract infection  | 1.52(0.81,2.86) | 0.190   | 1.59(0.73,3.43)   | 0.242   |
| Urinary tract infection            | 0.6(0.12,3.13)  | 0.544   | 4.02(1.01,16.05)  | 0.049*  |
| Skin and musculoskeletal infection | -               | 0.967   | 4.45(0.37,53.59)  | 0.240   |
| Intra-abdominal infection          | 0.45(0.05,4.19) | 0.486   | 9.32(0.32,275.24) | 0.196   |
| <b>SOFA</b>                        |                 |         |                   |         |
| qSOFA = 0,1                        | 0.88(0.45,1.69) | 0.692   | 1.68(0.62,4.57)   | 0.313   |
| qSOFA = 2,3                        | 0.76(0.3,1.88)  | 0.545   | 2.32(1.29,4.17)   | 0.005** |

\* p<0.05, \*\* p<0.01

**Supplementary Table 2.** Model of propensity score (AUC: 0.68)

|                                    | <b>OR (95%CI)</b> | <b>P value</b> |
|------------------------------------|-------------------|----------------|
| <b>Demographics</b>                |                   |                |
| Male sex                           | 1.14(0.83,1.58)   | 0.418          |
| Age                                | 1.04(0.98,1.10)   | 0.240          |
| Age squared                        | 1.00(1.00,1.00)   | 0.453          |
| Nursing home residents             | 1.09(0.58,2.05)   | 0.796          |
| <b>Comorbidities</b>               |                   |                |
| Diabetes mellitus                  | 1.70(1.21,2.37)   | 0.002**        |
| COPD                               | 1.22(0.67,2.21)   | 0.512          |
| Stroke                             | 0.97(0.62,1.51)   | 0.889          |
| Myocardial infarction              | 0.64(0.27,1.53)   | 0.313          |
| Congestive heart failure           | 1.24(0.73,2.12)   | 0.421          |
| Chronic kidney disease             | 1.24(0.76,2.02)   | 0.384          |
| Chronic liver disease              | 1.25(0.78,2.02)   | 0.354          |
| Malignancies                       | 1.38(0.89,2.16)   | 0.155          |
| <b>Site of primary infection</b>   |                   |                |
| Lower respiratory tract infection  | 0.79(0.57,1.08)   | 0.142          |
| Urinary tract infection            | 1.85(1.20,2.85)   | 0.005**        |
| Skin and musculoskeletal infection | 1.25(0.55,2.85)   | 0.601          |
| Hepatobiliary infection            | 2.45(1.39,4.32)   | 0.002**        |
| Intra-abdomen infection            | 0.98(0.53,1.81)   | 0.946          |
| <b>Organ dysfunction</b>           |                   |                |
| SOFA score                         | 1.03(0.91,1.17)   | 0.633          |
| SOFA score squared                 | 1.00(0.99,1.01)   | 0.506          |

\*  $p < 0.05$ , \*\*  $p < 0.01$

**Supplementary Table 3.** Microbiology of bacteria isolated

| Microbiology of bacteria isolated   | Number (%) |
|-------------------------------------|------------|
| <i>Escherichia coli</i>             | 53 (24.5%) |
| <i>Klebsiella pneumoniae</i>        | 21 (9.7%)  |
| <i>Staphylococcus epidermidis</i>   | 20 (9.3%)  |
| <i>Staphylococcus aureus</i>        | 14 (6.5%)  |
| <i>Staphylococcus hominis</i>       | 10 (4.6%)  |
| <i>Coagulase neg. staphylococci</i> | 10 (4.6%)  |
| <i>Staphylococcus haemolyticus</i>  | 8 (3.7%)   |
| <i>Streptococcus agalactiae</i>     | 3 (1.4%)   |
| <i>Pseudomonas aeruginosa</i>       | 3 (1.4%)   |
| <i>Penicillium marneffeii</i>       | 3 (1.4%)   |
| <i>Enterococcus faecium</i>         | 3 (1.4%)   |
| <i>Enterobacter cloacae</i>         | 3 (1.4%)   |
| <i>Acinetobacter baumannii</i>      | 3 (1.4%)   |
| <i>Viridans streptococci</i>        | 2 (0.9%)   |
| <i>Salmonella</i>                   | 2 (0.9%)   |
| <i>Other gram negative bacilli</i>  | 2 (0.9%)   |
| <i>Other enterococcus species</i>   | 2 (0.9%)   |
| <i>Enterococcus faecium</i>         | 2 (0.9%)   |
| <i>Streptococcus pneumoniae</i>     | 1 (0.5%)   |
| <i>Streptococcus mitis</i>          | 1 (0.5%)   |
| <i>Streptococcus intermedius</i>    | 1 (0.5%)   |
| <i>Streptococcus anginosus</i>      | 1 (0.5%)   |
| <i>Stenotrophomonas maltophilia</i> | 1 (0.5%)   |
| <i>Staphylococcus xylosus</i>       | 1 (0.5%)   |
| <i>Staphylococcus warneri</i>       | 1 (0.5%)   |

|                                  |           |
|----------------------------------|-----------|
| <i>Staphylococcus cohnii</i>     | 1 (0.5%)  |
| <i>Staphylococcus capitis</i>    | 1 (0.5%)  |
| <i>Sphingomonas paucimobilis</i> | 1 (0.5%)  |
| <i>Ochrobactrum anthropi</i>     | 1 (0.5%)  |
| <i>Morganella morganii</i>       | 1 (0.5%)  |
| <i>Moraxella species</i>         | 1 (0.5%)  |
| <i>Micrococcus luteus</i>        | 1 (0.5%)  |
| <i>Klebsiella oxytoca</i>        | 1 (0.5%)  |
| <i>Fusobacterium necrophorum</i> | 1 (0.5%)  |
| <i>Enterococcus faecalis</i>     | 1 (0.5%)  |
| <i>Capnocytophaga sputigena</i>  | 1 (0.5%)  |
| <i>Candida glabrata</i>          | 1 (0.5%)  |
| <i>Brucella melitensis</i>       | 1 (0.5%)  |
| <i>Aeromonas hydrophila</i>      | 1 (0.5%)  |
| Polymicrobial infection          | 31(14.4%) |

**Supplementary Figure 1.** Patient inclusion flowchart

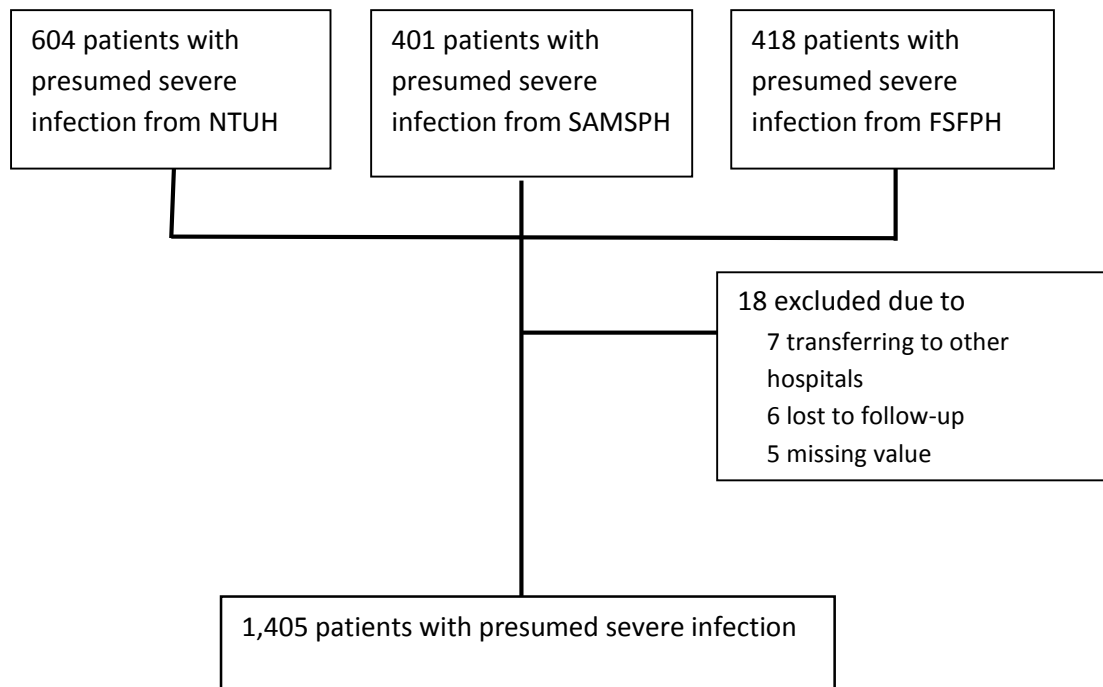

NTUH: National Taiwan University Hospital; SAMSPH: Sichuan Academy of Medical Sciences and Sichuan Provincial People's Hospital; FSFPH: The First People's Hospital of Foshan; ICU: intensive care unit

**Supplementary Figure 2.** Covariate balance before (blue) and after (red) IPTW weighting for culture negative versus culture positive sepsis patients. Improved balance (i.e., reduced standardized differences) was obtained after IPTW weighting.

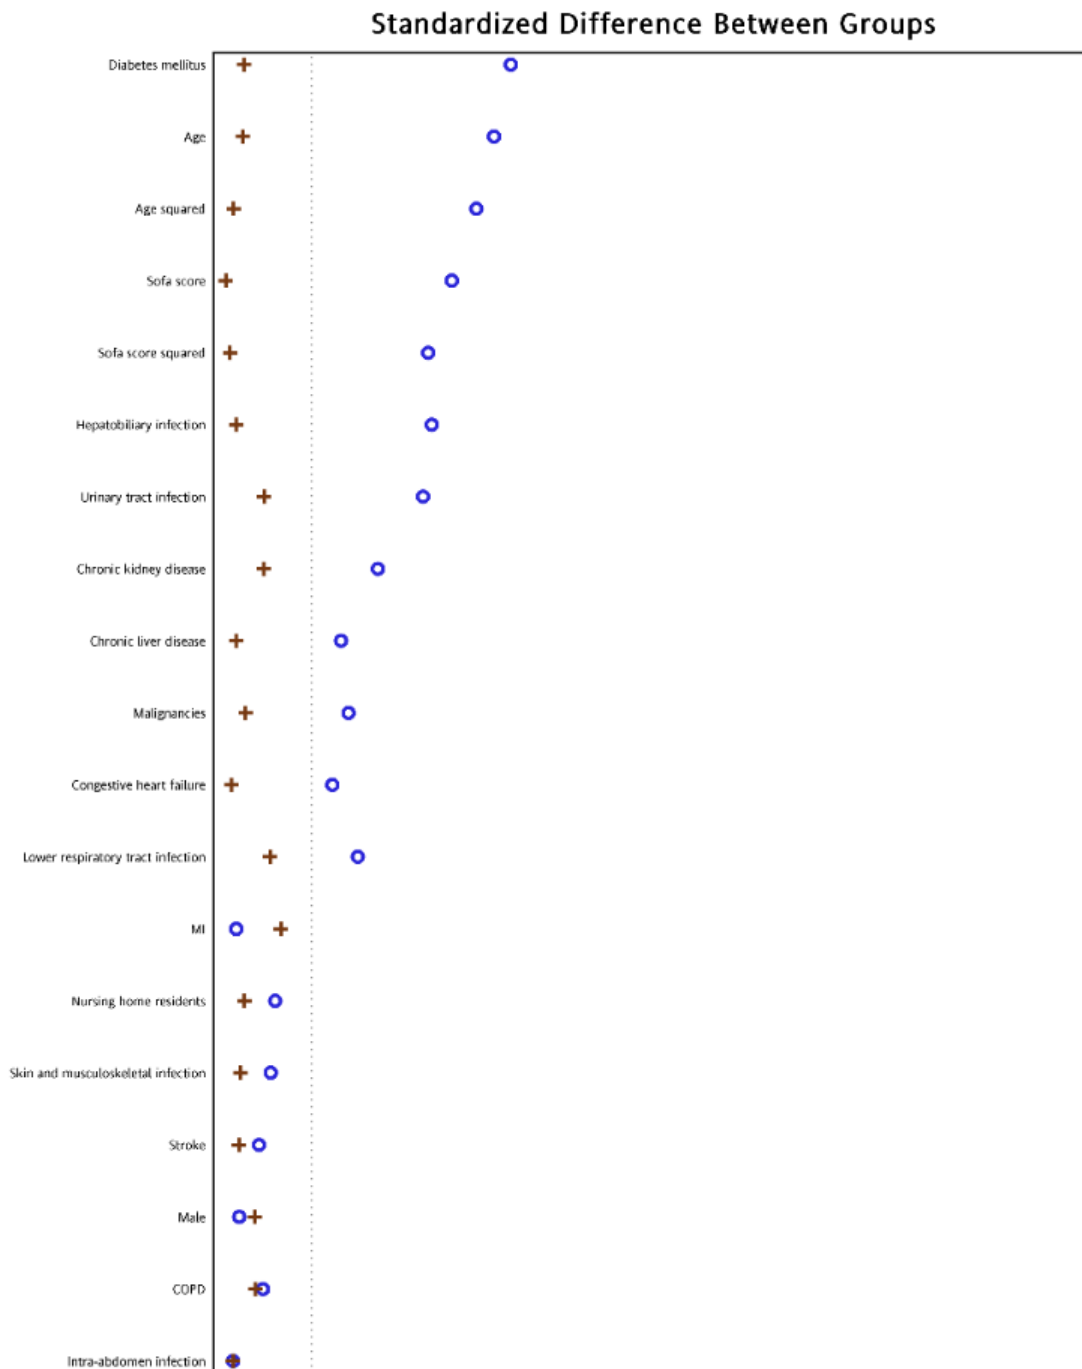

Supplement: MOESM1 [file 18867890]
